# Supplementary material for: PATELLINS are regulators of auxin-mediated PIN1 relocation and plant development in Arabidopsis thaliana
Source: Oxford University Press journal article supplement (doi:10.1242/jcs.204198), 2017-07-08
Supplement: jcs204198supp.pdf [file jcs204198supp.pdf]

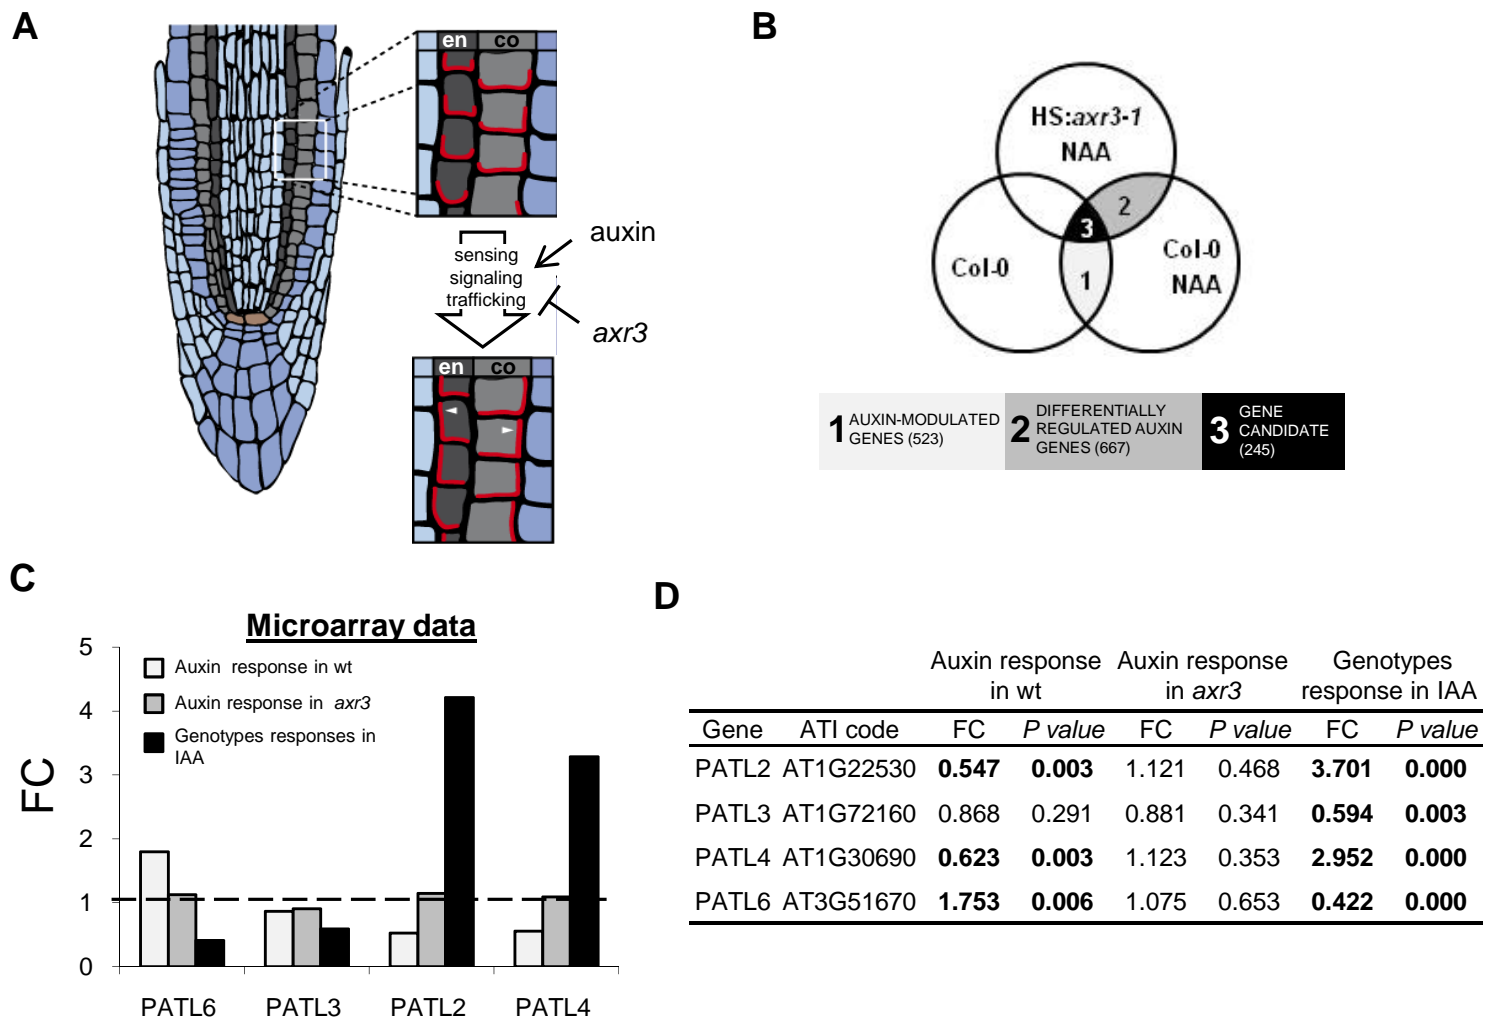

**Figure S1. Microarray for auxin effect on PIN lateralization identifies PATELLINS as candidate genes.**

**A.** PIN1 and PIN2 are basally localized in endodermis and young cortex cells, respectively, pumping auxin in the direction of the root tip. Auxin is able to modify PIN1 and PIN2 localization to baso-lateral. This effect is dependent on the AXR3-mediated transcription of so far unknown components.

**B.** Microarray results. Among the auxin-regulated genes in wild type, we selected 245 gene candidates as being auxin inducible but differentially expressed in the dominant negative version of AXR3 (*HS:axr3-1*).

**C, D.** PATELLINS are auxin-regulated genes in an AXR3-dependent fashion. PATL6 is auxin inducible depending on AXR3. On the other hand, PATL2 and PATL4 are negatively regulated by auxin and in the *HS:axr3-1* mutant background these effects were lost. In D, the Fold Change (FC) and the *P* values for the *PATL* genes obtained in the microarray data.

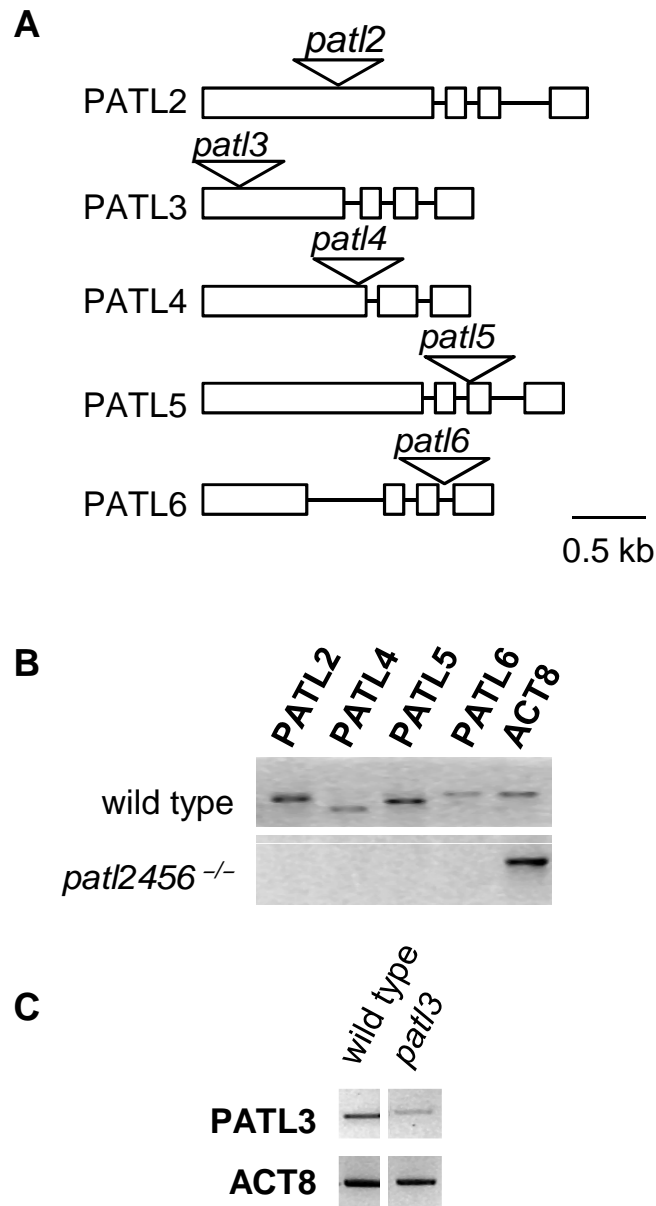

**Figure S2. PATELLIN quadruple mutant *patl2456*<sup>-/-</sup>**

**A-C.** Scheme of *PATL* genes representing exons (boxes) and introns (lines) and the insertion sites of the T-DNA insertions in the *patl* mutants (A). RT-PCR analysis for *PATL* gene expression in wild type and *patl2456*<sup>-/-</sup> quadruple knockout mutants (B) and *patl3* knockdown mutant (C).

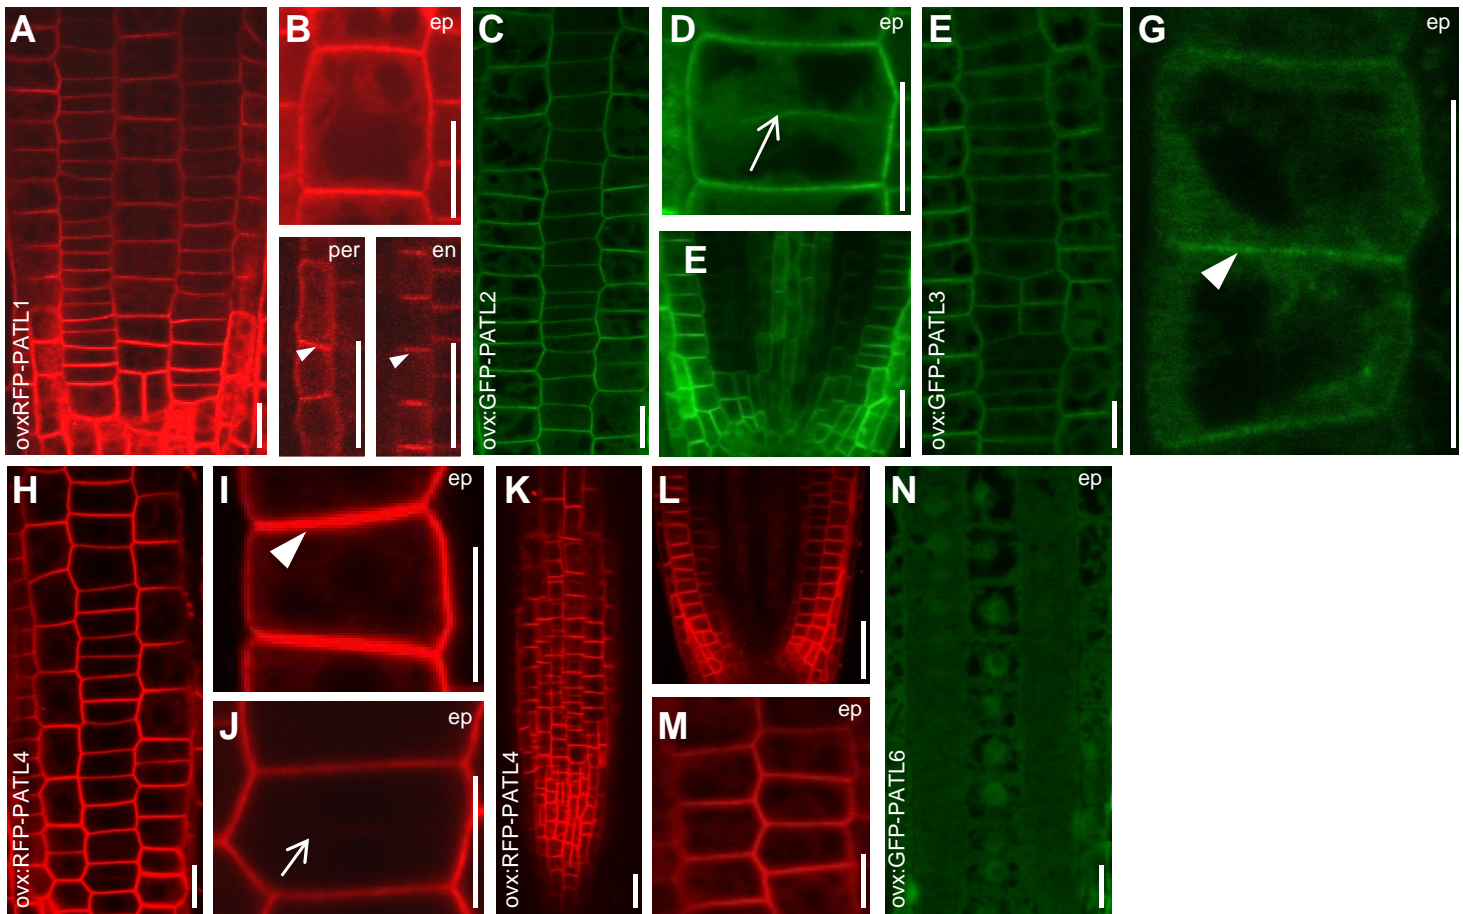

**Figure S3. PATELLIN localization in FP-PATL overexpressors lines.**

FP-PATL1-5 are localized at the PM or cell plates, and GFP-PATL6 is accumulated at PATL localization was observed in primary roots in GFP-PATL (C to G, N) or RFP-PATL (A, B, H to L) reporter lines expressed in wild type plants using the Cauliflower mosaic virus 35S promoter. Arrowheads are used to highlight asymmetric localization at plasma membranes (B, G), arrowheads depict asymmetric PATL localization at the plasma membrane (C, I, J, O) and arrows indicate cell plate localized PATLs (D, H). . All images are representative of at least 20 different individuals. Bar size= 20 μm.

**Table S1.** Candidates genes differentially regulated in *HS::axr3-2* compared to auxin-regulated genes in wild type. The gene model description is depicted as it appears in TAIR database. In bold are indicated the candidates that were tested for defects on PIN polarity.

[Click here to Download Table S1](#)

**Table S2.** Sec14-like proteins in *Arabidopsis*.

| Gene model  | ATI code  | Sec14p homology |         |         | Other protein domains |
|-------------|-----------|-----------------|---------|---------|-----------------------|
|             |           | Identities      | +       | E value |                       |
| AtSFH1/COW1 | AT4G34580 | 102/242         | 152/242 | 1e-53   | Nodullin <sup>a</sup> |
| AtSFH2      | AT4G39180 | 102/236         | 146/236 | 2e-53   | Nodullin <sup>a</sup> |
| AtSFH3      | AT2G21540 | 104/250         | 150/250 | 1e-52   | Nodullin <sup>a</sup> |
| AtSFH4      | AT1G19650 | 103/241         | 150/241 | 1e-51   | Nodullin <sup>a</sup> |
| AtSFH5      | AT1G75370 | 101/241         | 147/241 | 3e-48   | Nodullin <sup>a</sup> |
| AtSFH6      | AT4G39170 | 97/239          | 149/239 | 1e-50   | Nodullin <sup>a</sup> |
| AtSFH7      | AT2G16380 | 102/248         | 149/248 | 1e-49   | Nodullin <sup>a</sup> |
| AtSFH8      | AT2G21520 | 97/243          | 150/243 | 7e-49   | Nodullin <sup>a</sup> |
| AtSFH9      | AT3G24840 | 100/242         | 141/242 | 2e-47   | Nodullin <sup>a</sup> |
| AtSFH10     | AT2G18180 | 89/232          | 140/232 | 1e-47   | Nodullin <sup>a</sup> |
| AtSFH11     | AT5G47510 | 95/236          | 133/236 | 2e-46   | ND                    |
| AtSFH12     | AT4G36490 | 91/243          | 146/243 | 4e-47   | Nodullin <sup>a</sup> |
| AtSFH13     | AT1G55690 | 90/237          | 141/237 | 5e-40   | Nodullin <sup>a</sup> |
| AtSFH14     | AT5G56160 | 90/236          | 142/236 | 4e-43   | ND                    |
| PATL1       | AT1G72150 | 58/221          | 100/221 | 2e-11   | GOLD; CRAL/Trio       |
| PATL2       | AT1G22530 | 69/221          | 103/221 | 3e-11   | GOLD; CRAL/Trio       |
| PATL3       | AT1G72160 | 62/216          | 106/216 | 4e-17   | GOLD; CRAL/Trio       |
| PATL4       | AT1G30690 | 68/224          | 106/224 | 2e-16   | GOLD; CRAL/Trio       |
| PATL5       | AT4G09160 | 62/217          | 101/217 | 2e-15   | GOLD; CRAL/Trio       |
| PATL6       | AT3G51670 | 68/232          | 102/232 | 1e-14   | GOLD; CRAL/Trio       |
| AtPITPs     | AT4G36640 | 75/254          | 116/254 | 9e-18   | -                     |
|             | AT5G47730 | 60/209          | 99/209  | 2e-16   | -                     |
|             | AT1G55840 | 62/209          | 98/209  | 4e-16   | -                     |
|             | AT1G01630 | 66/218          | 98/218  | 1e-15   | -                     |
|             | AT1G75170 | 67/217          | 102/217 | 4e-15   | -                     |
|             | AT1G22180 | 31/96           | 56/96   | 7e-08   | -                     |
|             | AT4G08690 | 56/218          | 97/218  | 2e-10   | -                     |
|             | AT1G14820 | 54/222          | 96/222  | 2e-08   | -                     |
|             | AT3G46450 | 54/213          | 86/213  | 2e-06   | -                     |
|             | AT1G05370 | 41/182          | 79/182  | 5e-05   | -                     |
|             | AT5G63060 | 52/214          | 88/214  | 2e-03   | -                     |
|             | AT3G22410 | 39/183          | 85/183  | 5e-04   | -                     |

**Table S3.** Segregation of *patl2* mutant allele in the progeny of a single *patl2*<sup>+/-</sup> 3456<sup>-/-</sup> mutant plant.

| <i>patl2</i> | <i>n<sub>o</sub></i> | <i>f<sub>o</sub></i> | <i>n<sub>E</sub></i> | <i>f<sub>E</sub></i> |
|--------------|----------------------|----------------------|----------------------|----------------------|
| + / +        | 14                   | 0.1944               | 18                   | 0.25                 |
| + / -        | 51                   | 0.7083               | 36                   | 0.5                  |
| - / -        | 7                    | 0.0972               | 18                   | 0.25                 |
| <b>TOTAL</b> | <b>72</b>            | <b>1</b>             | <b>72</b>            | <b>1</b>             |

$$\chi^2 = 13.861$$

$$p = 0.001$$

*n<sub>o</sub>* observed amount; *f<sub>o</sub>* observed frequency; *n<sub>E</sub>* expected amount; *f<sub>E</sub>* expected frequency. Expected values under the assumption of Mendelian traits and no linkage among the different alleles.

**Table S4.** List of primers used for cloning procedures, *patl* mutant genotyping, amiRNA construct and transcripts level analysis.

| Gene   | Sequence                                  | Orientation | Application                     |
|--------|-------------------------------------------|-------------|---------------------------------|
| PATL1  | ATGGCTCAAGAGGAAGTAC                       | Fw          | Cloning coding sequence, RT-PCR |
| PATL1  | AGTTTTGAACCTGTAGTAG                       | Rv          | Cloning coding sequence, RT-PCR |
| PATL2  | ATGGCTCAAGAAGAGATAC                       | Fw          | Cloning coding sequence, RT-PCR |
| PATL2  | TGCTTGGGTTTTGGACCTG                       | Rv          | Cloning coding sequence, RT-PCR |
| PATL3  | ATGGCTGAAGAACCTACTAC                      | Fw          | Cloning coding sequence, RT-PCR |
| PATL3  | GAGAGGTTTGACATTGAAC                       | Rv          | Cloning coding sequence, RT-PCR |
| PATL4  | ATGACTGCTGAAGTTAAGG                       | Fw          | Cloning coding sequence, RT-PCR |
| PATL4  | GGAAGAGGATTCAGTCTTG                       | Rv          | Cloning coding sequence, RT-PCR |
| PATL5  | ATGTCTCAAGATTCTGCAAC                      | Fw          | Cloning coding sequence, RT-PCR |
| PATL5  | CTCACAAGCTAAAGGCTTA                       | Rv          | Cloning coding sequence, RT-PCR |
| PATL6  | ATGGATGCTTCATTGTCTCC                      | Fw          | Cloning coding sequence, RT-PCR |
| PATL6  | GACGGTTGTAGTAGATTCCGG                     | Rv          | Cloning coding sequence, RT-PCR |
| ACTIN8 | ACCTTGCTGGTCGTGACCTTACTG                  | Fw          | RT-PCR                          |
| ACTIN8 | GATCCCGTCATGGAAACGATGTCTC                 | Rv          | RT-PCR                          |
| PATL1  | GGATTTTTAACGGATCACTC                      | Fw          | Promoter sequence cloning       |
| PATL1  | CTTCTTGCTGATTTTAGA                        | Rv          | Promoter sequence cloning       |
| PATL2  | TCCGGTTTGACTGGATTTTT                      | Fw          | Promoter sequence cloning       |
| PATL2  | GATCACTTGATTCGAAAGGG                      | Rv          | Promoter sequence cloning       |
| PATL3  | TTTTACTTGTGCCGTCTTG                       | Fw          | Promoter sequence cloning       |
| PATL3  | GCAGGTTTAGGAAACAATTC                      | Rv          | Promoter sequence cloning       |
| PATL4  | ATAACTGTTGACTTCAACTA                      | Fw          | Promoter sequence cloning       |
| PATL4  | CTTAAAGCCTGTCATTCAGA                      | Rv          | Promoter sequence cloning       |
| PATL5  | CCCTAATTCACATTGGTC                        | Fw          | Promoter sequence cloning       |
| PATL5  | TTTTTATTGTTCTTGAA                         | Rv          | Promoter sequence cloning       |
| PATL6  | TATTTAGCCATAGTGGAAAG                      | Fw          | Promoter sequence cloning       |
| PATL6  | TGTTTCTTGAGAGTTTTTC                       | Rv          | Promoter sequence cloning       |
| PATL2  | GGAAAAATCTCTTGAGGCTGAA                    | Right       | Genotyping <i>patl</i> mutants  |
| PATL2  | CTTGTTGTCGACACCGTGAG                      | Left        | Genotyping <i>patl</i> mutants  |
| PATL3  | GTCATTGGATCCAATTCACG                      | Right       | Genotyping <i>patl</i> mutants  |
| PATL3  | AACCTTCTCAAGATCATCCAC                     | Left        | Genotyping <i>patl</i> mutants  |
| PATL4  | TCTACTGTTTTGAACCCACCG                     | Right       | Genotyping <i>patl</i> mutants  |
| PATL4  | CTGAGGCTGTTGTTACCGAAG                     | Left        | Genotyping <i>patl</i> mutants  |
| PATL5  | TTTGTAGCTGGTGGTGTTC                       | Right       | Genotyping <i>patl</i> mutants  |
| PATL5  | GGCTTTTGTACTACAAGC                        | Left        | Genotyping <i>patl</i> mutants  |
| PATL6  | CAAACCCAAGAAAGAAAACCC                     | Right       | Genotyping <i>patl</i> mutants  |
| PATL6  | ATTTGTGCGGTTTCTTGAG                       | Left        | Genotyping <i>patl</i> mutants  |
| LBb1+  | ATTTTGCCGATTTCCGGAAC                      |             | Genotyping <i>patl</i> mutants  |
| LBa1   | TGGTTCACGTAGTGGCCATCG                     |             | Genotyping <i>patl</i> mutants  |
| PATL1  | gaTATAGTGTAGTTTGGCTGGCGTctctctttgtattcc   | miR-s       | amiRNAa                         |
| PATL1  | gaCCGCCAGCAAACCTACTATAAtcaaagagaatcaatga  | miR-a       | amiRNAa                         |
| PATL1  | gaCCACCAGCAAACCTTCACTATTtcacaggtcgtgatag  | miR*s       | amiRNAa                         |
| PATL1  | gaAATAGTGAAGTTTGGCTGGTGGTctcatatataattcct | miR*a       | amiRNAa                         |
| PATL1  | gaTCGAATTGTTTAAACAGCCCGTtctctctttgtattcc  | miR-s       | amiRNAb                         |
| PATL1  | gaACGGGCTGTTAAACAATTCGAtcaaagagaatcaatga  | miR-a       | amiRNAb                         |
| PATL1  | gaACAGGCTGTTAAAGAATTCGTtcacaggtcgtgatag   | miR*s       | amiRNAb                         |
| PATL1  | gaACGAATTCTTTAAACAGCCTGTtcatatataattcct   | miR*a       | amiRNAb                         |
| PATL3  | gaTGTCTTATTATAAAGCTCCGTtctctctttgtattcc   | miR-s       | amiRNAa                         |
| PATL3  | gaACGGAGCTTTATAATAAGACAtcaaagagaatcaatga  | miR-a       | amiRNAa                         |
| PATL3  | gaACAGAGCTTTATATTAAGACTtcacaggtcgtgatag   | miR*s       | amiRNAa                         |
| PATL3  | gaAGTCTTAATATAAAGCTCTGTtcatatataattcct    | miR*a       | amiRNAa                         |
| PATL3  | gaTACACATAAGATATCTCGCTTtctctctttgtattcc   | miR-s       | amiRNAb                         |
| PATL3  | gaAAGCGAGATATCTTATGTGTAtcaaagagaatcaatga  | miR-a       | amiRNAb                         |
| PATL3  | gaAAACGAGATATCTAATGTGTTtcacaggtcgtgatag   | miR*s       | amiRNAb                         |
| PATL3  | gaAACACATTAGATATCTCGTTTtcatatataattcct    | miR*a       | amiRNAb                         |
